# Supplementary material for: A general strategy for tailoring upconversion luminescence in lanthanide-doped inorganic nanocrystals through local structure engineering
Source: Royal Society of Chemistry journal article supplement (doi:10.1039/c8nr01519h), 2018-01-01
Supplement: c8nr01519h1.pdf [file c8nr01519h1.pdf]

## Electronic Supplementary Information (ESI) for Nanoscale

# A General Strategy for Tailoring Upconversion Luminescence in Lanthanide-Doped Inorganic Nanocrystals through Local Structure Engineering

Huhui Fu,<sup>abcd</sup> Pengfei Peng,<sup>ac</sup> Renfu Li,<sup>a</sup> Caiping Liu,<sup>a</sup> Yongsheng Liu,<sup>\*ab</sup> Feilong Jiang,<sup>a</sup> Maochun Hong,<sup>\*abc</sup> Xueyuan Chen<sup>\*abc</sup>

<sup>a</sup>CAS Key Laboratory of Design and Assembly of Functional Nanostructures, and State Key Laboratory of Structural Chemistry, Fujian Institute of Research on the Structure of Matter, Chinese Academy of Sciences, Fuzhou, Fujian 350002, China.

<sup>b</sup>University of the Chinese Academy of Sciences, Beijing, 100049, China

<sup>c</sup>School of Physical Science and Technology, ShanghaiTech University, Shanghai 201210, China

<sup>d</sup>Shanghai Institute of Ceramics, Chinese Academy of Sciences, Shanghai 200050, China

\*To whom correspondence should be addressed, e-mail: liuysh@fjirsm.ac.cn, hmc@fjirsm.ac.cn, and xchen@fjirsm.ac.cn

## Supplementary Experimental Section

**General procedure for the Preparation of NaYF<sub>4</sub>:Yb/Er nanocrystals (NCs).** In a typical procedure of the synthesis of hexagonal-phase NaYF<sub>4</sub>:Yb/Er nanocrystals, 0.39 mmol of Y(CH<sub>3</sub>CO<sub>2</sub>)<sub>3</sub>.4H<sub>2</sub>O, 0.1 mmol of Yb(CH<sub>3</sub>CO<sub>2</sub>)<sub>3</sub>.4H<sub>2</sub>O and 0.01 mmol of Er(CH<sub>3</sub>CO<sub>2</sub>)<sub>3</sub>.4H<sub>2</sub>O were mixed with 5 mL of oleic acid (OA) and 16 mL of 1-octadecene (ODE) in a 100 mL three-neck round-bottom flask. The solution was heated to 150 °C under N<sub>2</sub> flow with constant stirring for 60 min to form a clear solution, and then cooled down to room temperature. Thereafter, 10 mL of methanol solution containing 1.25 mmol of NaOH and 2 mmol of NH<sub>4</sub>F was added and the resulting mixture was stirred for 30 min. After removal of the methanol by evaporation, the solution was heated to 300 °C under N<sub>2</sub> flow with vigorous stirring for 60 min, and then cooled down to room temperature. The resulting hexagonal-phase NaYF<sub>4</sub>:Yb/Er NCs were precipitated by addition of ethanol, collected by centrifugation, washed with ethanol for several times, and finally re-dispersed in cyclohexane. The synthetic procedure for the cubic-phase NaYF<sub>4</sub>:Yb/Er NCs was the same as that used to synthesize the hexagonal-phase NaYF<sub>4</sub>:Yb/Er NCs, except that the amount of NaOH and reaction temperature were changed to 0.5 mmol and 270 °C, respectively.

## Supplementary Tables

**Table S1.** Comparison of the optimized crystal lattice parameters by using the first-principle calculation based on density functional theory (DFT) for Yb<sup>3+</sup>, Er<sup>3+</sup> and Yb<sup>3+</sup>/Er<sup>3+</sup> doped Na<sub>3</sub>ZrF<sub>7</sub>, Na<sub>5</sub>Zr<sub>2</sub>F<sub>13</sub> and Na<sub>7</sub>Zr<sub>6</sub>F<sub>31</sub> crystals with the experimental data of their pure counterparts from JCPDS or ICSD database.

|                           | <b>Na<sub>3</sub>ZrF<sub>7</sub><sup>[a]</sup></b>              | <b>Na<sub>3</sub>ZrF<sub>7</sub>:Er</b>              | <b>Na<sub>3</sub>ZrF<sub>7</sub>:Yb</b>              | <b>Na<sub>3</sub>ZrF<sub>7</sub>:Yb/Er</b>              |
|---------------------------|-----------------------------------------------------------------|------------------------------------------------------|------------------------------------------------------|---------------------------------------------------------|
| Space group               | <i>I4/mmm</i>                                                   | <i>I4/mmm</i>                                        | <i>I4/mmm</i>                                        | <i>I4/mmm</i>                                           |
| <i>a</i> / Å              | 10.4264                                                         | 10.4312                                              | 10.3954                                              | 10.4032                                                 |
| <i>b</i> / Å              | 10.4264                                                         | 10.4312                                              | 10.3954                                              | 10.4032                                                 |
| <i>c</i> / Å              | 10.5126                                                         | 10.5361                                              | 10.5114                                              | 10.5158                                                 |
| $\alpha$                  | 90.000                                                          | 90.000                                               | 90.000                                               | 90.000                                                  |
| $\beta$                   | 90.000                                                          | 90.000                                               | 90.000                                               | 90.000                                                  |
| $\gamma$                  | 90.000                                                          | 90.000                                               | 90.000                                               | 90.000                                                  |
| <i>V</i> / Å <sup>3</sup> | 1142.808                                                        | 1146.43                                              | 1135.91                                              | 1138.10                                                 |
|                           |                                                                 |                                                      |                                                      |                                                         |
|                           | <b>Na<sub>5</sub>Zr<sub>2</sub>F<sub>13</sub><sup>[a]</sup></b> | <b>Na<sub>5</sub>Zr<sub>2</sub>F<sub>13</sub>:Er</b> | <b>Na<sub>5</sub>Zr<sub>2</sub>F<sub>13</sub>:Yb</b> | <b>Na<sub>5</sub>Zr<sub>2</sub>F<sub>13</sub>:Yb/Er</b> |
| Space group               | <i>C2/m</i>                                                     | <i>C2/m</i>                                          | <i>C2/m</i>                                          | <i>C2/m</i>                                             |
| <i>a</i> / Å              | 11.5475                                                         | 11.5592                                              | 11.5512                                              | 11.5582                                                 |
| <i>b</i> / Å              | 11.1066                                                         | 11.1093                                              | 10.9870                                              | 10.9965                                                 |
| <i>c</i> / Å              | 8.9122                                                          | 8.9409                                               | 8.9251                                               | 8.9548                                                  |
| $\alpha$                  | 90.000                                                          | 90.000                                               | 90.000                                               | 90.000                                                  |
| $\beta$                   | 93.216                                                          | 93.101                                               | 93.074                                               | 92.922                                                  |
| $\gamma$                  | 90.000                                                          | 90.000                                               | 90.000                                               | 90.000                                                  |
| <i>V</i> / Å <sup>3</sup> | 1141.23                                                         | 1146.46                                              | 1131.09                                              | 1136.67                                                 |
|                           |                                                                 |                                                      |                                                      |                                                         |
|                           | <b>Na<sub>7</sub>Zr<sub>6</sub>F<sub>31</sub><sup>[a]</sup></b> | <b>Na<sub>7</sub>Zr<sub>6</sub>F<sub>31</sub>:Er</b> | <b>Na<sub>7</sub>Zr<sub>6</sub>F<sub>31</sub>:Yb</b> | <b>Na<sub>7</sub>Zr<sub>6</sub>F<sub>31</sub>:Yb/Er</b> |
| Space group               | <i>R-3</i>                                                      | <i>R-3</i>                                           | <i>R-3</i>                                           | <i>R-3</i>                                              |
| <i>a</i> / Å              | 13.4617                                                         | 13.5717                                              | 13.5573                                              | 13.5905                                                 |
| <i>b</i> / Å              | 13.4617                                                         | 13.5411                                              | 13.5411                                              | 13.5969                                                 |
| <i>c</i> / Å              | 9.3850                                                          | 9.3662                                               | 9.3883                                               | 9.4163                                                  |
| $\alpha$                  | 90.000                                                          | 89.982                                               | 89.952                                               | 90.104                                                  |
| $\beta$                   | 90.000                                                          | 89.985                                               | 89.956                                               | 89.991                                                  |
| $\gamma$                  | 120.000                                                         | 120.339                                              | 120.215                                              | 120.350                                                 |
| <i>V</i> / Å <sup>3</sup> | 1472.87                                                         | 1485.55                                              | 1489.35                                              | 1501.56                                                 |

<sup>[a]</sup>The calculated crystal lattice parameters for pure tetragonal-phase Na<sub>3</sub>ZrF<sub>7</sub>, monoclinic-phase Na<sub>5</sub>Zr<sub>2</sub>F<sub>13</sub>, trigonal-phase Na<sub>7</sub>Zr<sub>6</sub>F<sub>31</sub> crystals are well consistent with the experimental crystal lattice parameters reported from JCPDS or ICSD database (JCPDS No. 12-0562 for Na<sub>3</sub>ZrF<sub>7</sub>, ICSD No. 155759 for Na<sub>5</sub>Zr<sub>2</sub>F<sub>13</sub> and JCPDS No. 72-1551 for Na<sub>7</sub>Zr<sub>6</sub>F<sub>31</sub>), which thereby demonstrates the reliability of our first-principle calculation based on DFT.

**Table S2.** Calculated formation energies (defined as the energy difference per unit cell between the nanocrystal and isolated atoms) for pure, Yb<sup>3+</sup>, Er<sup>3+</sup> and Yb<sup>3+</sup>/Er<sup>3+</sup> doped Na<sub>3</sub>ZrF<sub>7</sub>, Na<sub>5</sub>Zr<sub>2</sub>F<sub>13</sub> and Na<sub>7</sub>Zr<sub>6</sub>F<sub>31</sub> crystals by using the first-principle calculation based on DFT. Generally speaking, the larger absolute value of formation energy, the more stable is the crystal.

| Crystal                                                | Content of dopant (mol %) | Formation energy per atom (eV) |
|--------------------------------------------------------|---------------------------|--------------------------------|
| Na <sub>3</sub> ZrF <sub>7</sub>                       | 0                         | -64.11                         |
| Na <sub>3</sub> ZrF <sub>7</sub> :Er                   | 12.5                      | -64.12                         |
| Na <sub>3</sub> ZrF <sub>7</sub> :Yb                   | 12.5                      | -64.26                         |
| Na <sub>3</sub> ZrF <sub>7</sub> :Yb/Er                | 12.5 (Yb/Er = 1)          | -64.26                         |
| Na <sub>5</sub> Zr <sub>2</sub> F <sub>13</sub>        | 0                         | -4.13                          |
| Na <sub>5</sub> Zr <sub>2</sub> F <sub>13</sub> :Er    | 12.5                      | -4.14                          |
| Na <sub>5</sub> Zr <sub>2</sub> F <sub>13</sub> :Yb    | 12.5                      | -4.30                          |
| Na <sub>5</sub> Zr <sub>2</sub> F <sub>13</sub> :Yb/Er | 12.5 (Yb/Er = 1)          | -4.31                          |
| Na <sub>7</sub> Zr <sub>6</sub> F <sub>31</sub>        | 0                         | -19.35                         |
| Na <sub>7</sub> Zr <sub>6</sub> F <sub>31</sub> :Er    | 12.5                      | -19.36                         |
| Na <sub>7</sub> Zr <sub>6</sub> F <sub>31</sub> :Yb    | 12.5                      | -19.43                         |
| Na <sub>7</sub> Zr <sub>6</sub> F <sub>31</sub> :Yb/Er | 12.5 (Yb/Er = 1)          | -19.43                         |

**Table S3.** Actual Yb<sup>3+</sup> and Er<sup>3+</sup> doping concentrations determined from the inductively coupled plasma atomic emission spectroscopy (ICP-AES) for Na<sub>3</sub>ZrF<sub>7</sub>:Yb/Er, Na<sub>5</sub>Zr<sub>2</sub>F<sub>13</sub>:Yb/Er and Na<sub>7</sub>Zr<sub>6</sub>F<sub>31</sub>:Yb/Er NCs doped with 20 mol% Yb<sup>3+</sup> and 2 mol% Er<sup>3+</sup>.

| Sample                                                 | Nominal Yb/Er doping content (mol%) | Actual Yb/Er doping content from ICP-AES (mol%) |
|--------------------------------------------------------|-------------------------------------|-------------------------------------------------|
| Na <sub>3</sub> ZrF <sub>7</sub> :Yb/Er                | 20/2                                | 19.8 ± 1.1/1.9 ± 0.2                            |
| Na <sub>5</sub> Zr <sub>2</sub> F <sub>13</sub> :Yb/Er | 20/2                                | 18.6 ± 0.9/2.1 ± 0.3                            |
| Na <sub>7</sub> Zr <sub>6</sub> F <sub>31</sub> :Yb/Er | 20/2                                | 20.1 ± 1.6/1.8 ± 0.3                            |

## Supplementary Figures

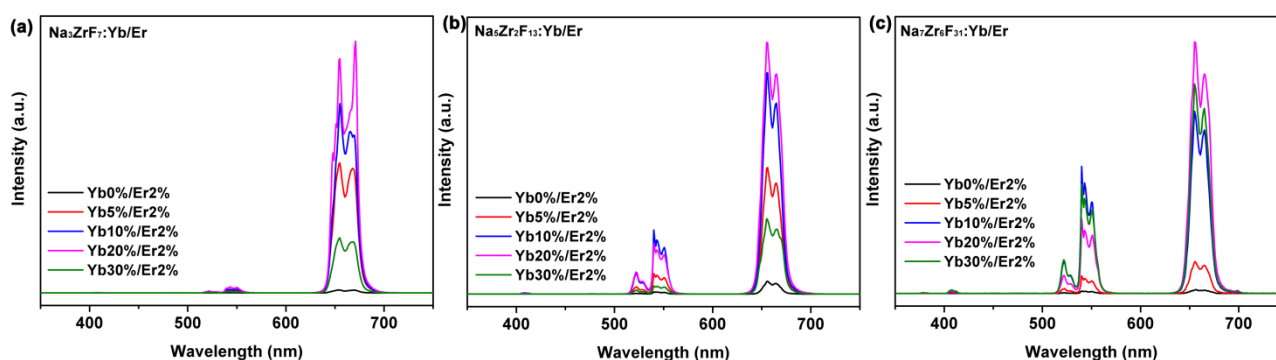

**Figure S1.** Room-temperature UC luminescence (UCL) spectra for a series of Yb/Er co-doped  $\text{Na}_3\text{ZrF}_7$ ,  $\text{Na}_5\text{Zr}_2\text{F}_{13}$  and  $\text{Na}_7\text{Zr}_6\text{F}_{31}$  NCs as a function of the  $\text{Yb}^{3+}$  ion doping concentration. All the UCL spectra were measured under identical experimental conditions upon a 980-nm diode laser excitation with a power density of  $30 \text{ W cm}^{-2}$ . These results clearly demonstrate that the optimum  $\text{Yb}^{3+}$  doping concentration for intense UCL of  $\text{Er}^{3+}$  was 20 mol% in  $\text{Na}_3\text{ZrF}_7$ ,  $\text{Na}_5\text{Zr}_2\text{F}_{13}$  and  $\text{Na}_7\text{Zr}_6\text{F}_{31}$  NCs, respectively.

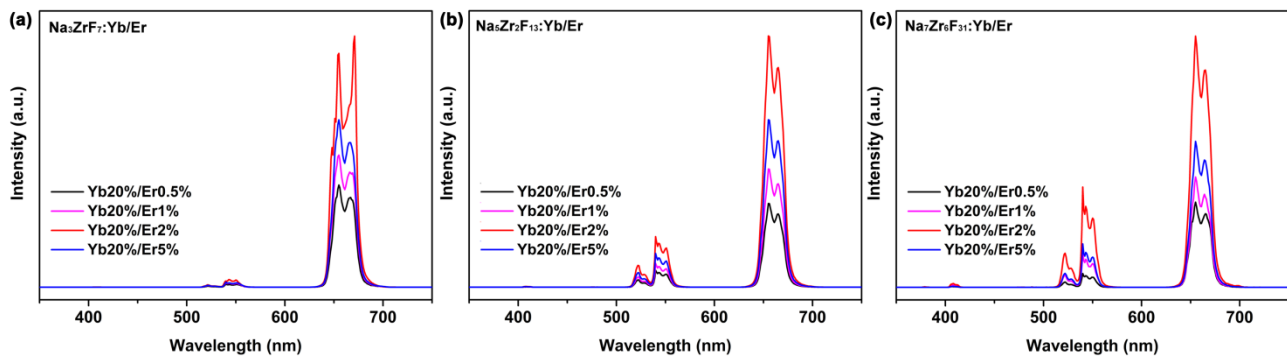

**Figure S2.** Room-temperature UCL spectra for a series of Yb/Er co-doped  $\text{Na}_3\text{ZrF}_7$ ,  $\text{Na}_5\text{Zr}_2\text{F}_{13}$  and  $\text{Na}_7\text{Zr}_6\text{F}_{31}$  NCs as a function of the  $\text{Er}^{3+}$  ion doping concentration. All the UCL spectra were measured under identical experimental conditions upon a 980-nm diode laser excitation with a power density of  $30 \text{ W cm}^{-2}$ . These results clearly show that the optimum  $\text{Er}^{3+}$  doping concentration for intense UCL was determined to be 2 mol% in  $\text{Na}_3\text{ZrF}_7$ ,  $\text{Na}_5\text{Zr}_2\text{F}_{13}$  and  $\text{Na}_7\text{Zr}_6\text{F}_{31}$  NCs, respectively.

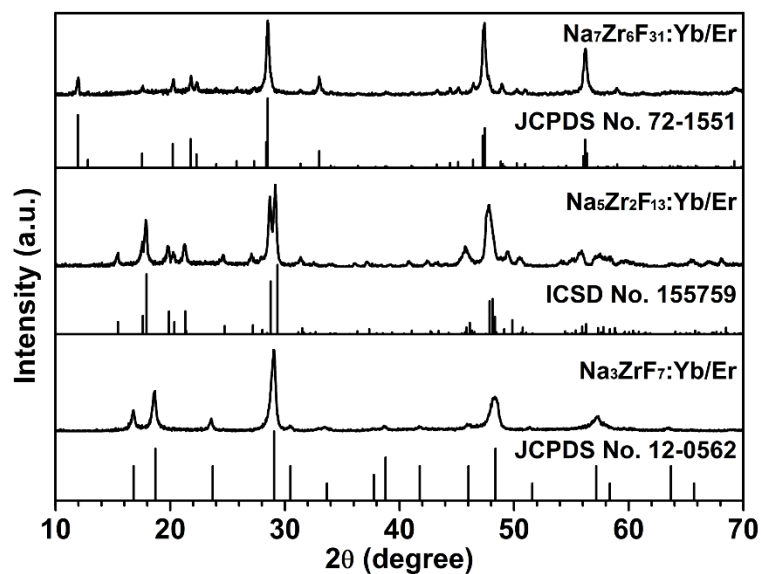

**Figure S3.** Powder X-ray diffraction (XRD) patterns for the as-synthesized Yb<sup>3+</sup>/Er<sup>3+</sup> (20/2 mol%) co-doped Na<sub>3</sub>ZrF<sub>7</sub>, Na<sub>5</sub>Zr<sub>2</sub>F<sub>13</sub> and Na<sub>7</sub>Zr<sub>6</sub>F<sub>31</sub> NCs, showing that all the XRD peaks can be well indexed in accordance with tetragonal-phase Na<sub>3</sub>ZrF<sub>7</sub> structure (JCPDS No. 12-0562, space group *I4*/mmm), monoclinic-phase Na<sub>5</sub>Zr<sub>2</sub>F<sub>13</sub> structure (ICSD No. 155759, space group *C2*/m) and trigonal-phase Na<sub>7</sub>Zr<sub>6</sub>F<sub>31</sub> structure (JCPDS No. 72-1551, space group *R*-3), respectively.

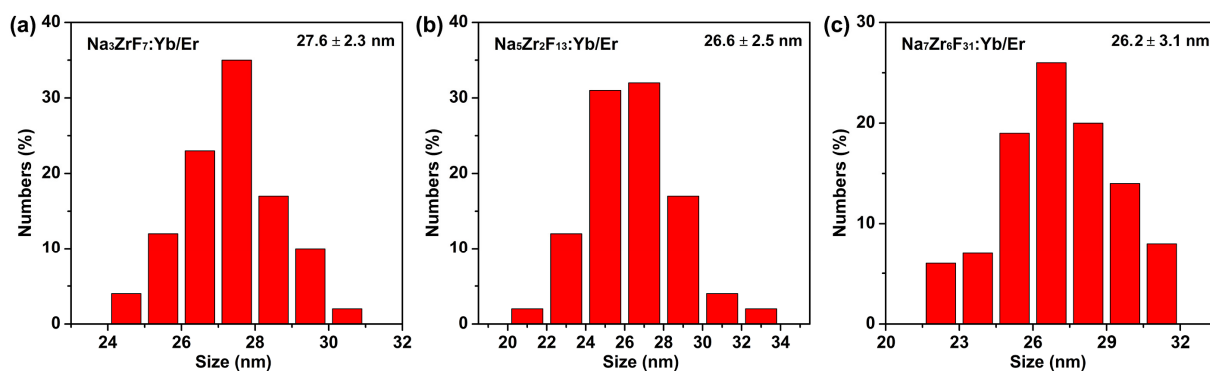

**Figure S4.** Size distributions for the as-synthesized  $\text{Yb}^{3+}/\text{Er}^{3+}$  co-doped a)  $\text{Na}_3\text{ZrF}_7$ , b)  $\text{Na}_5\text{Zr}_2\text{F}_{13}$  and c)  $\text{Na}_7\text{Zr}_6\text{F}_{31}$  NCs. The average sizes for the as-synthesized  $\text{Yb}^{3+}/\text{Er}^{3+}$  co-doped  $\text{Na}_3\text{ZrF}_7$ ,  $\text{Na}_5\text{Zr}_2\text{F}_{13}$  and  $\text{Na}_7\text{Zr}_6\text{F}_{31}$  NCs were determined to be  $27.6 \pm 2.3$ ,  $26.6 \pm 2.5$  and  $26.2 \pm 3.1$  nm, respectively, on the basis of their corresponding size histograms obtained from TEM images of 200 nanocrystals.

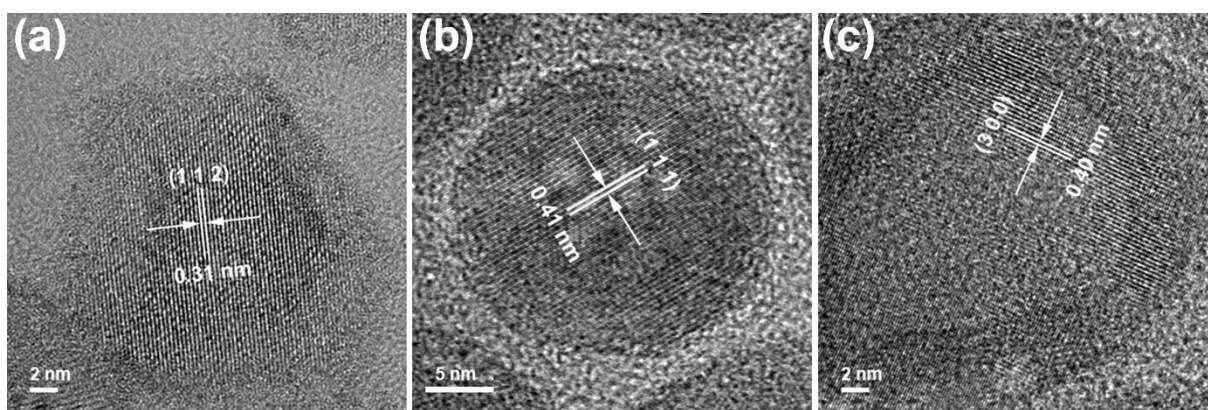

**Figure S5.** High-resolution transmission electron microscopy (TEM) images for the as-synthesized a)  $\text{Na}_3\text{ZrF}_7\text{:Yb/Er}$ , b)  $\text{Na}_5\text{Zr}_2\text{F}_{13}\text{:Yb/Er}$  and c)  $\text{Na}_7\text{Zr}_6\text{F}_{31}\text{:Yb/Er}$  NCs. The high-resolution TEM images show lattice fringes with observed d-spacing of 0.31, 0.41 and 0.40 nm, which are in good agreement with the lattice spacings of the (112), (111) and (300) planes for tetragonal-phase  $\text{Na}_3\text{ZrF}_7$ , monoclinic-phase  $\text{Na}_5\text{Zr}_2\text{F}_{13}$  and trigonal-phase  $\text{Na}_7\text{Zr}_6\text{F}_{31}$  crystals, respectively, and then demonstrate the high crystallinity for the as-synthesized  $\text{Na}_3\text{ZrF}_7\text{:Yb/Er}$ ,  $\text{Na}_5\text{Zr}_2\text{F}_{13}\text{:Yb/Er}$  and  $\text{Na}_7\text{Zr}_6\text{F}_{31}\text{:Yb/Er}$  NCs.



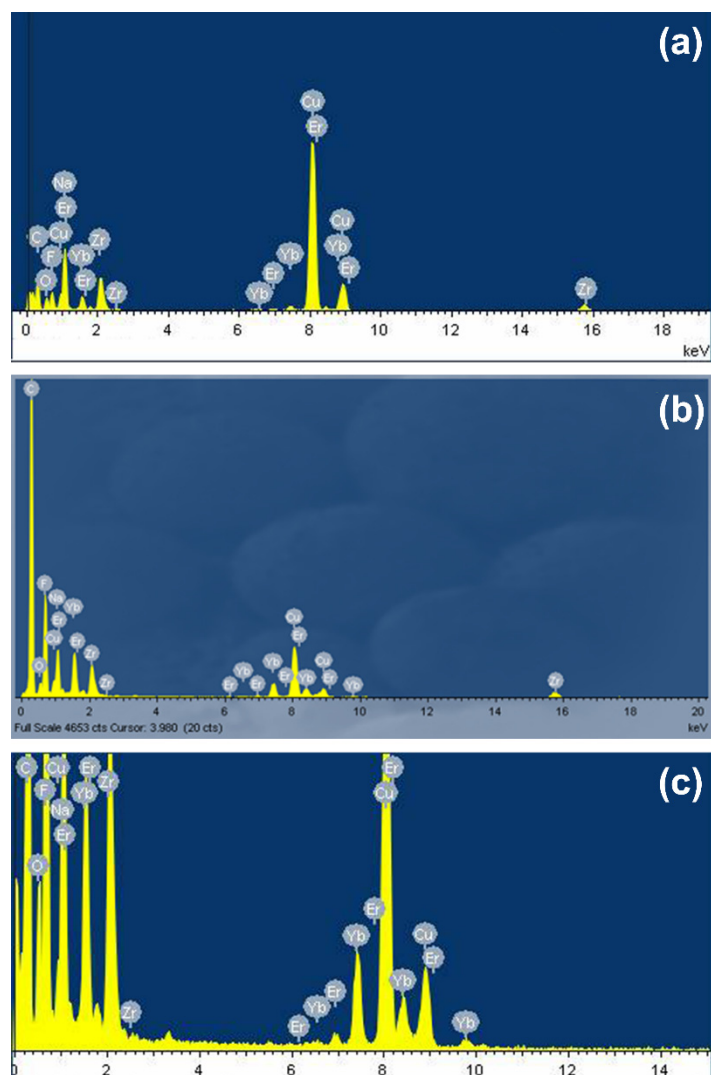

**Figure S6.** Energy-dispersive X-ray spectroscopy (EDS) analyses for the as-synthesized  $\text{Na}_3\text{ZrF}_7\text{:Yb/Er}$ , b)  $\text{Na}_5\text{Zr}_2\text{F}_{13}\text{:Yb/Er}$  and c)  $\text{Na}_7\text{Zr}_6\text{F}_{31}\text{:Yb/Er}$  NCs, revealing the presence of the doped elements of Yb and Er in all the as-synthesized NCs.

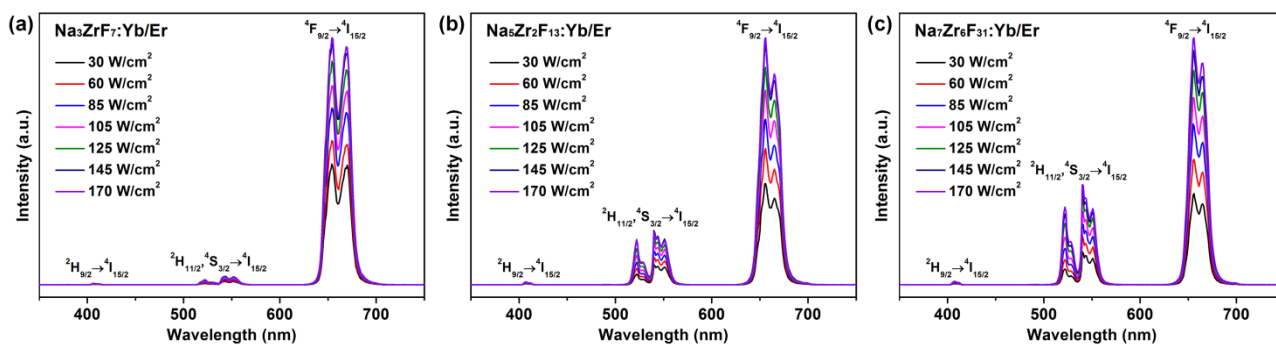

**Figure S7.** Room-temperature UCL spectra for Yb/Er (20/2 mol%) co-doped a)  $\text{Na}_3\text{ZrF}_7$ , b)  $\text{Na}_5\text{Zr}_2\text{F}_{13}$  and c)  $\text{Na}_7\text{Zr}_6\text{F}_{31}$  NCs as a function of the varied excitation power density of 980-nm diode laser. The UCL peaks ascribed to the  $^2\text{H}_{9/2} \rightarrow ^4\text{I}_{15/2}$  transition of  $\text{Er}^{3+}$  for Yb/Er (20/2 mol) co-doped  $\text{Na}_3\text{ZrF}_7$ ,  $\text{Na}_5\text{Zr}_2\text{F}_{13}$  and  $\text{Na}_7\text{Zr}_6\text{F}_{31}$  NCs were hardly detectable even at a high power density of excitation of 980-nm diode laser up to  $170 \text{ W cm}^{-2}$ . These results indicate that the populations of high-lying energy levels (e.g.,  $^2\text{H}_{9/2}$  and  $^2\text{H}_{11/2}$ ) of  $\text{Er}^{3+}$  involving a large number of UC excitation steps in these NCs is strongly suppressed particularly for the  $\text{Na}_3\text{ZrF}_7\text{:Yb/Er}$  NCs with high-symmetry local structure of host  $\text{Zr}^{4+}$  ion.

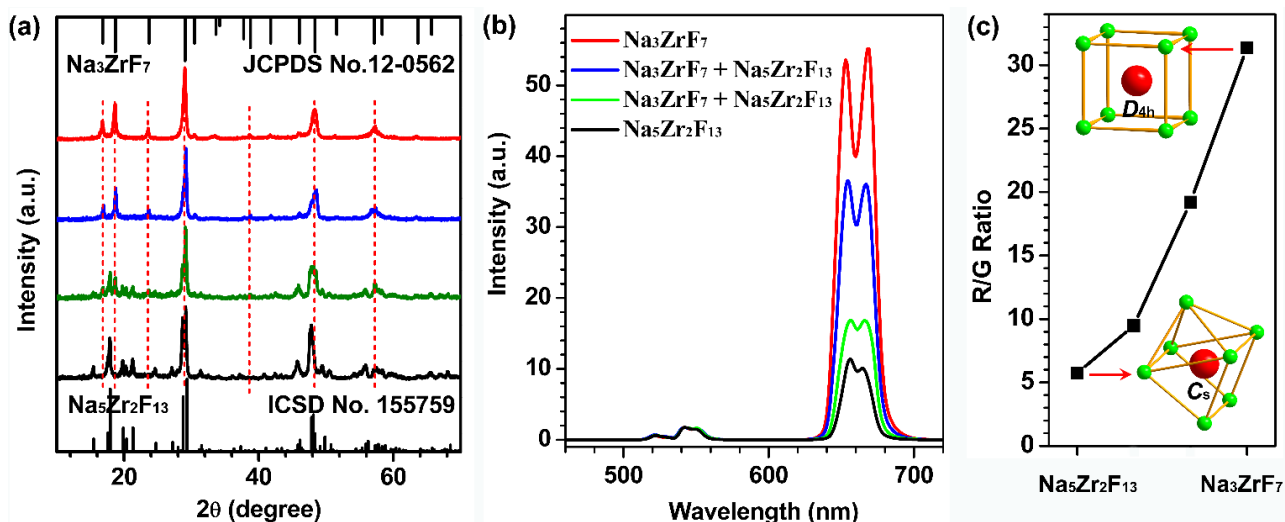

**Figure S8.** a) XRD patterns for the mixed sodium zirconium fluoride NCs with different  $\text{Na}_3\text{ZrF}_7$ :Yb/Er and  $\text{Na}_5\text{Zr}_2\text{F}_{13}$ :Yb/Er contents and their corresponding b) UCL patterns and c) UCL red-to-green (R/G) intensity ratios with the varied site symmetries of host  $\text{Zr}^{4+}$  ion. Note that all the UCL patterns in Figure S8b were normalized at the green UCL band centered at 542 nm to clearly demonstrate the evolution of the R/G intensity ratio with the gradually increased  $\text{Na}_5\text{Zr}_2\text{F}_{13}$ :Yb/Er content. The transformation from tetragonal-phase  $\text{Na}_3\text{ZrF}_7$  to monoclinic-phase  $\text{Na}_5\text{Zr}_2\text{F}_{13}$  crystal structure in these mixed NCs can be well evidenced by using the XRD analysis (Figure S8a). As a result, the R/G UCL ratio in these samples was observed to dramatically decrease (Figure S8b-c) with the increasing content of  $\text{Na}_5\text{Zr}_2\text{F}_{13}$ :Yb/Er NCs with  $C_s$  site-symmetry of host  $\text{Zr}^{4+}$  ion, which unambiguously demonstrates the critical role of local structure (or site symmetry) of host  $\text{Zr}^{4+}$  ion in regulating the UCL profiles for the doped  $\text{Er}^{3+}$  ion.

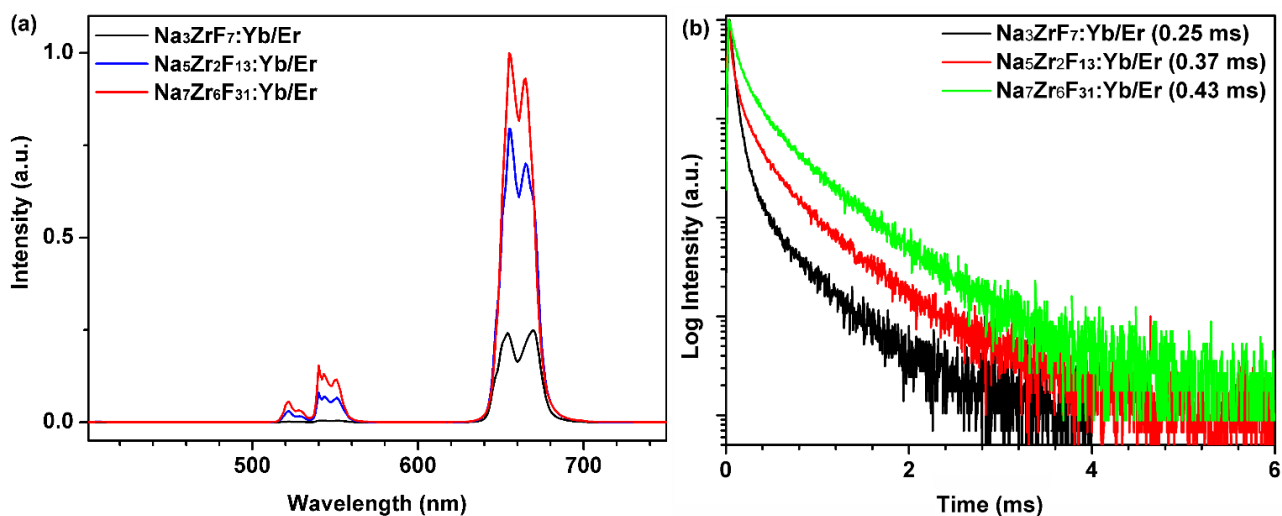

**Figure S9.** Comparison of a) UCL spectra and b) decay curves for Yb/Er (20/2 mol%) co-doped  $\text{Na}_3\text{ZrF}_7$ ,  $\text{Na}_5\text{Zr}_2\text{F}_{13}$  and  $\text{Na}_7\text{Zr}_6\text{F}_{31}$  NCs. Note that all the UCL spectra were measured under identical experimental conditions upon a 980-nm diode laser excitation with a power density of  $30 \text{ W cm}^{-2}$ , while the UCL decay curves were collected by monitoring  $\text{Er}^{3+}$  UCL centered at 650 nm upon excitation by a 980-nm pulsed laser. The integrated UCL intensity for  $\text{Yb}^{3+}/\text{Er}^{3+}$  co-doped  $\text{Na}_3\text{ZrF}_7$  NCs was found to be about 3-5 times weaker than those in  $\text{Na}_5\text{Zr}_2\text{F}_{13}:\text{Yb}/\text{Er}$  and  $\text{Na}_7\text{Zr}_6\text{F}_{31}:\text{Yb}/\text{Er}$  counterparts, and the effective UCL lifetime of  $\text{Er}^{3+}$  ion in  $\text{Na}_3\text{ZrF}_7:\text{Yb}/\text{Er}$  NCs was also determined to be shorter than those in  $\text{Na}_5\text{Zr}_2\text{F}_{13}:\text{Yb}/\text{Er}$  and  $\text{Na}_7\text{Zr}_6\text{F}_{31}:\text{Yb}/\text{Er}$  NCs. The weaker UCL intensity and shorter UCL lifetime for Yb/Er co-doped  $\text{Na}_3\text{ZrF}_7$  NCs is understandable due to the high-symmetry two-dimensional layered sublattice of  $\text{Zr}^{4+}$  ion that facilitates the long-distance energy transfer between the doping  $\text{Er}^{3+}$  (or  $\text{Yb}^{3+}$ ) ions and their neighboring  $\text{Zr}^{4+}$  ions (or lattice/surface defects) and thus promote the dissipation of the excitation energy as heat in the lattices of  $\text{Na}_3\text{ZrF}_7$  NCs.

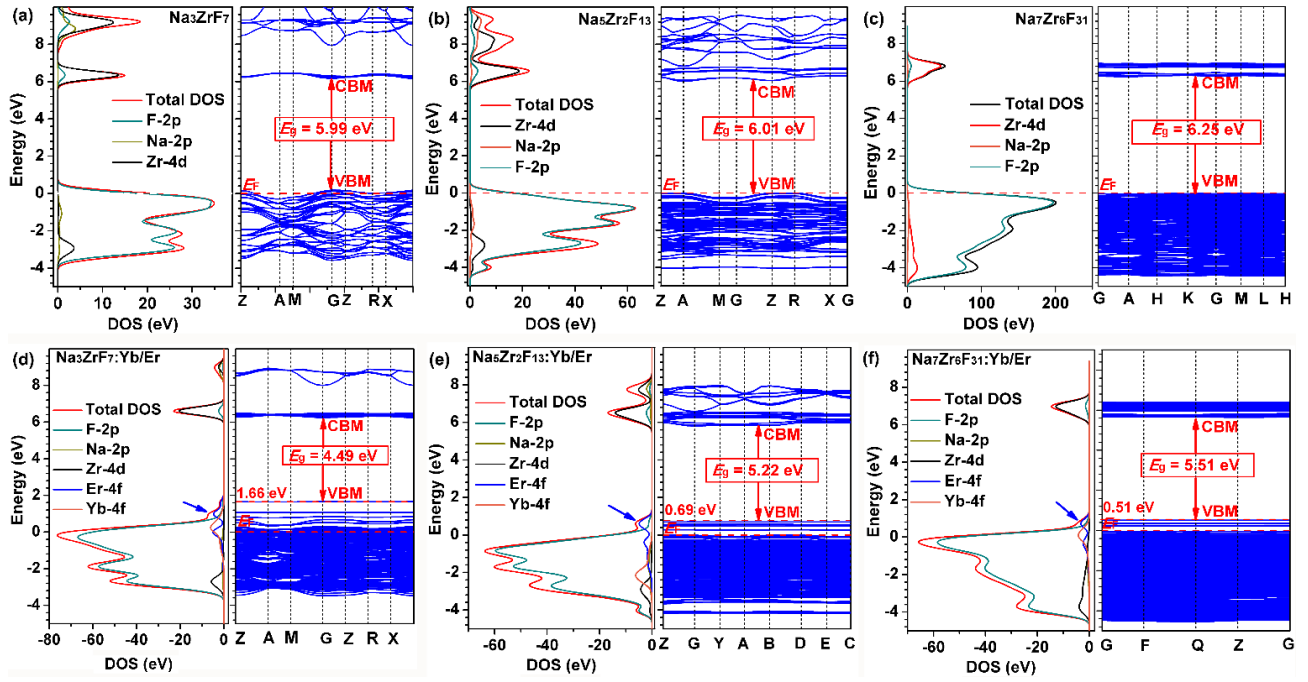

**Figure S10.** Comparison of DFT-calculated electronic band structures (right) and projected density of states (DOS) (left) for a-c) pure and d-f) Yb/Er co-doped  $\text{Na}_3\text{ZrF}_7$ ,  $\text{Na}_5\text{Zr}_2\text{F}_{13}$  and  $\text{Na}_7\text{Zr}_6\text{F}_{31}$  NCs. Note that the  $E_g$  represents the band gap energy between the conduction band minimum (CBM) and the valence band maximum (VBM), and the  $E_F$  represents the Fermi level (0 eV) of sodium zirconium fluoride NCs. These DFT calculations show that the VBM for all the NCs is mainly contributed by the F 2p-orbitals, whereas the CBM originates predominately from the Zr 4d-orbitals. The band gap energies for Yb/Er co-doped  $\text{Na}_3\text{ZrF}_7$ ,  $\text{Na}_5\text{Zr}_2\text{F}_{13}$  and  $\text{Na}_7\text{Zr}_6\text{F}_{31}$  NCs were calculated to be 4.49, 5.22 and 5.51 eV, respectively, much smaller than those of their pure counterparts (5.99, 6.01 and 6.25 eV for  $\text{Na}_3\text{ZrF}_7$ ,  $\text{Na}_5\text{Zr}_2\text{F}_{13}$  and  $\text{Na}_7\text{Zr}_6\text{F}_{31}$  NCs, respectively). More importantly, the VBM for  $\text{Na}_3\text{ZrF}_7\text{:Yb/Er}$  NCs was calculated to significantly increase from Fermi level ( $E_F$ , 0 eV) to 1.66 eV, much higher than the incremental values achieved in the  $\text{Na}_5\text{Zr}_2\text{F}_{13}\text{:Yb/Er}$  ( $\sim 0.69$  eV) and  $\text{Na}_7\text{Zr}_6\text{F}_{31}\text{:Yb/Er}$  ( $\sim 0.51$  eV) NCs. These results clearly demonstrate that the symmetry of crystal lattice of these Yb/Er co-doped  $\text{Na}_3\text{ZrF}_7$ ,  $\text{Na}_5\text{Zr}_2\text{F}_{13}$  and  $\text{Na}_7\text{Zr}_6\text{F}_{31}$  NCs has significant impact on their respective electronic band structures upon doping of  $\text{Yb}^{3+}$  and  $\text{Er}^{3+}$  as well as the UCL behaviors of lanthanide emitters.

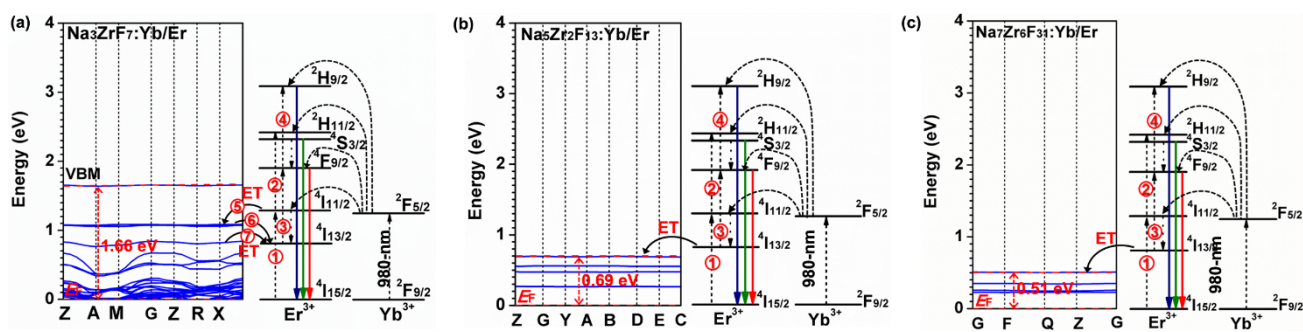

**Figure S11.** DFT-calculated electronic band structures (left) and the proposed energy transfer (ET) mechanisms between the excited  $\text{Yb}^{3+}$ ,  $\text{Er}^{3+}$  and the valence bands in a)  $\text{Na}_3\text{ZrF}_7\text{:Yb/Er}$ ,  $\text{Na}_5\text{Zr}_2\text{F}_{13}\text{:Yb/Er}$  and  $\text{Na}_7\text{Zr}_6\text{F}_{31}\text{:Yb/Er}$  NCs following excitation with a 980-nm laser. Note that the dashed, dotted, black and colored full arrows represent photon excitation, non-radiative multiphonon relaxation, ET and emission processes, respectively. Benefitting from the significantly increased VBM (1.66 eV) coupled with the unique electronic structure of  $\text{Na}_3\text{ZrF}_7\text{:Yb/Er}$  NCs, the ET steps marked by 5 to 7 in Figure S11a between the excited states of  $\text{Er}^{3+}$  and the valence band of  $\text{Na}_3\text{ZrF}_7$  host can take place in  $\text{Na}_3\text{ZrF}_7\text{:Yb/Er}$  NCs. These successive ET processes will somewhat increase the populations of the  $^4\text{I}_{13/2}$  state of  $\text{Er}^{3+}$ , and subsequently lead to the increased populations of  $^4\text{F}_{9/2}$  of  $\text{Er}^{3+}$  following the third ET step from the excited  $\text{Yb}^{3+}$  to  $\text{Er}^{3+}$  upon 980-nm laser excitation. As a result, the red UCL intensity was observed to be much stronger than the green and violet UCL bands of  $\text{Er}^{3+}$  in  $\text{Na}_3\text{ZrF}_7\text{:Yb/Er}$  NCs. By contrast, such ET processes between the excited  $\text{Er}^{3+}$  ion and the valence band of host materials cannot occur in  $\text{Na}_5\text{Zr}_2\text{F}_{13}\text{:Yb/Er}$  (0.69 eV) and  $\text{Na}_7\text{Zr}_6\text{F}_{31}\text{:Yb/Er}$  (0.51 eV) NCs due to their much lower VBM energies than that of  $\text{Na}_3\text{ZrF}_7\text{:Yb/Er}$  NCs (Figure S11b-c), which reveals that the  $^4\text{I}_{13/2}$  and  $^4\text{F}_{9/2}$  states of  $\text{Er}^{3+}$  in  $\text{Na}_5\text{Zr}_2\text{F}_{13}\text{:Yb/Er}$  and  $\text{Na}_7\text{Zr}_6\text{F}_{31}\text{:Yb/Er}$  can not be populated by additional photons as achieved in  $\text{Na}_3\text{ZrF}_7\text{:Yb/Er}$  NCs. This was the main reason why the larger UCL R/G ratio of  $\text{Er}^{3+}$  was achieved in  $\text{Na}_3\text{ZrF}_7\text{:Yb/Er}$  NCs than in their  $\text{Na}_5\text{Zr}_2\text{F}_{13}\text{:Yb/Er}$  and  $\text{Na}_7\text{Zr}_6\text{F}_{31}\text{:Yb/Er}$  counterparts.

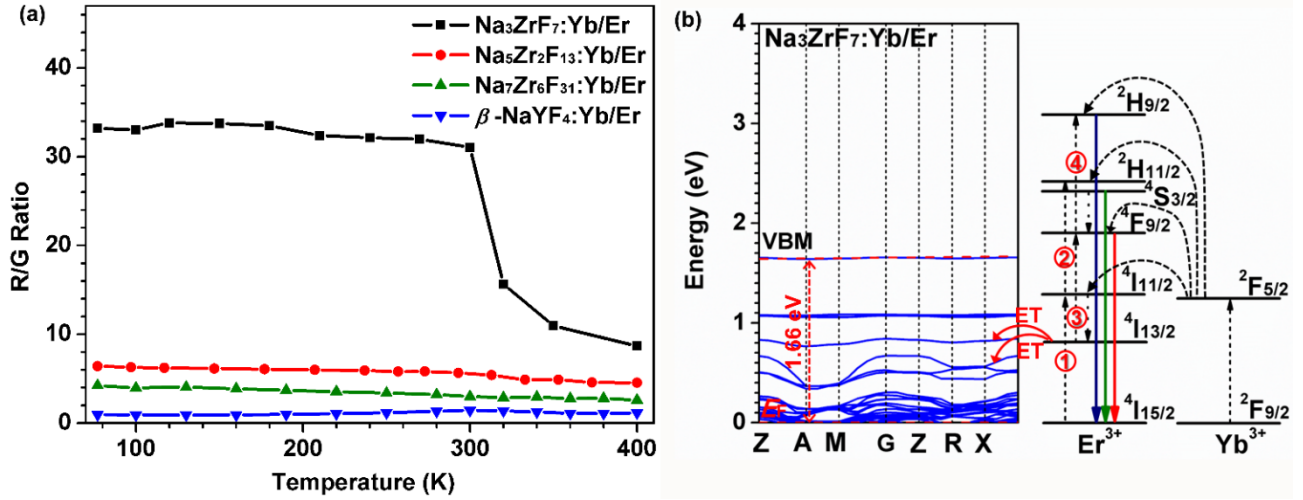

**Figure S12.** Temperature-dependent UCL intensities for the as-synthesized Na<sub>3</sub>ZrF<sub>7</sub>:Yb/Er, Na<sub>5</sub>Zr<sub>2</sub>F<sub>13</sub>:Yb/Er, Na<sub>7</sub>Zr<sub>6</sub>F<sub>31</sub>:Yb/Er and NaYF<sub>4</sub>:Yb/Er NCs measured in a temperature range from 77 to 400 K when excited with a 980-nm diode laser at a power density of 30 W cm<sup>-2</sup>. An abrupt drop in the UCL R/G ratio for the temperature-dependent UCL spectra of Na<sub>3</sub>ZrF<sub>7</sub>:Yb/Er NCs was detected when measured above 300 K, which was in stark contrast to the cases of Na<sub>5</sub>Zr<sub>2</sub>F<sub>13</sub>:Yb/Er and Na<sub>7</sub>Zr<sub>6</sub>F<sub>31</sub>:Yb/Er NCs whose UCL R/G ratios remain essentially unchanged even when heated to 400 K. Note that such abrupt drop in the UCL R/G ratio was also not detected in well-established UCL of Yb/Er co-doped hexagonal-phase NaYF<sub>4</sub>:Yb/Er NCs (blue in Figure S12a). These results may be caused by the increased probability of energy transfers from the <sup>4</sup>I<sub>13/2</sub> state of Er<sup>3+</sup> to the sublevels of valence band of Na<sub>3</sub>ZrF<sub>7</sub>:Yb/Er NCs at high temperature (>300 K) owing to the small energy mismatch (highlighted by red arrows in Figure S12b), which will somewhat decrease the populations of the <sup>4</sup>I<sub>13/2</sub> state of Er<sup>3+</sup> in Na<sub>3</sub>ZrF<sub>7</sub>:Yb<sup>3+</sup>/Er<sup>3+</sup> NCs and thus result in the decreased UCL R/G ratio above 300 K. By contrast, due to the large energy mismatch between the <sup>4</sup>I<sub>13/2</sub> state of Er<sup>3+</sup> to the valence band of Na<sub>5</sub>Zr<sub>2</sub>F<sub>13</sub>:Yb/Er and Na<sub>7</sub>Zr<sub>6</sub>F<sub>31</sub>:Yb/Er NCs (Figure S11b-c), such temperature-promoted energy transfer processes similar to the case of Na<sub>3</sub>ZrF<sub>7</sub>:Yb/Er NCs were negligible even at 400 K. As a result, no abrupt drop in the UCL R/G ratio was detected in Na<sub>5</sub>Zr<sub>2</sub>F<sub>13</sub>:Yb/Er and Na<sub>7</sub>Zr<sub>6</sub>F<sub>31</sub>:Yb/Er NCs.



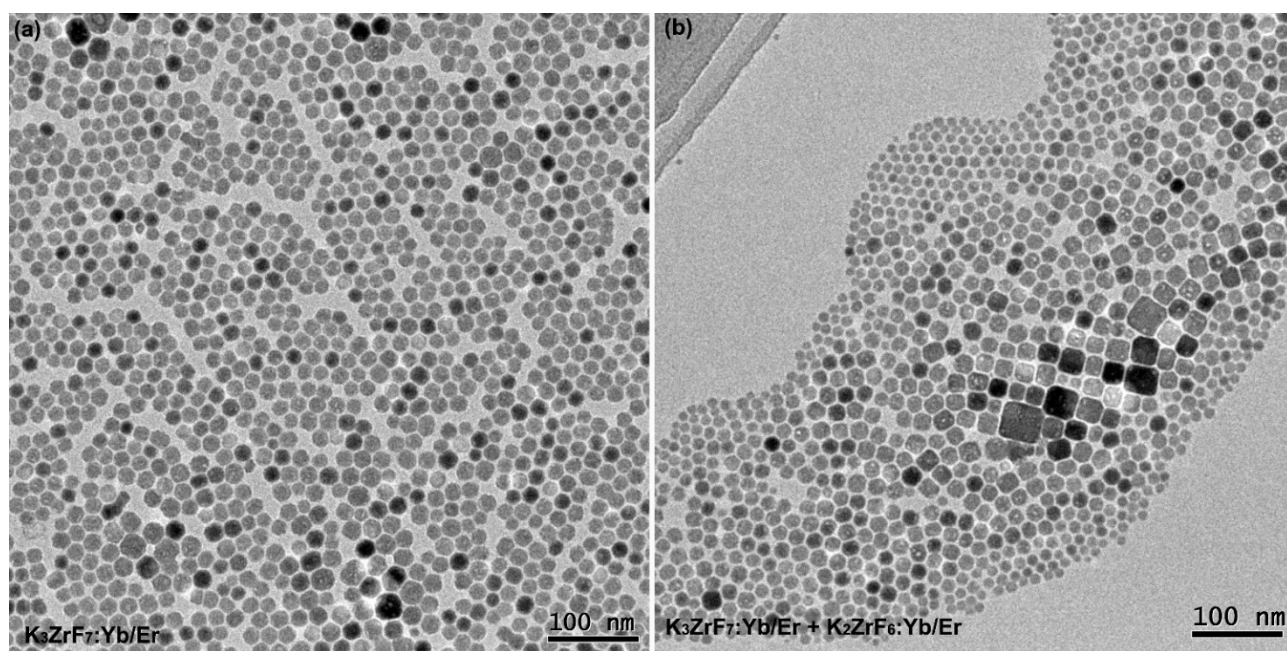

**Figure S13.** TEM images for the mixed potassium zirconium fluoride NCs with different  $K_3ZrF_7:Yb/Er$  and  $K_2ZrF_6:Yb/Er$  contents, showing the morphology transformation from a) cubic-phase  $K_3ZrF_7$  to b) the mixed potassium zirconium fluoride NCs of cubic-phase  $K_3ZrF_7$  and monoclinic-phase  $K_2ZrF_6$ .



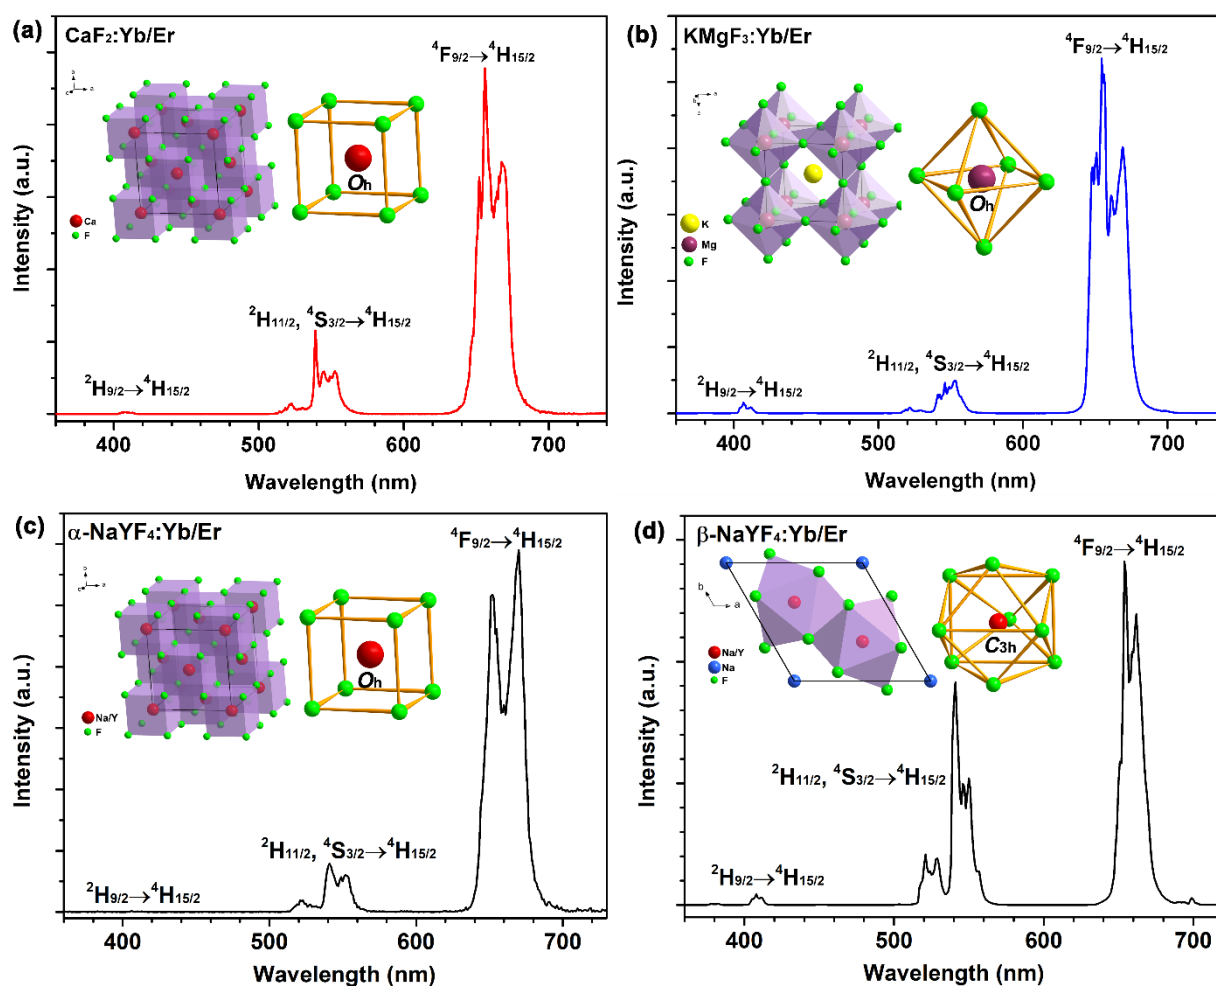

**Figure S14.** Typical UCL spectra for Yb<sup>3+</sup>/Er<sup>3+</sup> (20/2 mol%) co-doped cubic-phase (a) CaF<sub>2</sub> (ICSD No. 41413, space group *Fm*-3m), (b) KMgF<sub>3</sub> (ICSD No. 40476, space group *Pm*-3m) and (c) NaYF<sub>4</sub> (JCPDS No. 77-2042, space group *Fm*-3m) NCs featuring high-symmetry crystal sublattices of host cations under excitation of 980-nm diode laser at a power density of 30 Wcm<sup>-2</sup>. For comparison, the well-established UCL spectrum of Yb<sup>3+</sup>/Er<sup>3+</sup> (20/2 mol%) co-doped hexagonal-phase NaYF<sub>4</sub> NCs (JCPDS No. 28-1192, space group *P*6<sub>3</sub>/m) with a low-symmetry crystal sublattices of host cation (Y<sup>3+</sup>, C<sub>3h</sub>) was also shown in Figure S14d. The integrated intensities for the green UCL peaks for cubic-phase Yb<sup>3+</sup>/Er<sup>3+</sup> co-doped CaF<sub>2</sub>, KMgF<sub>3</sub> and NaYF<sub>4</sub> NCs were observed to be about 3-5 times weaker than their red UCL peaks, which differs markedly from that of hexagonal-phase NaYF<sub>4</sub> NCs with comparable red and green UCL intensities. These results further corroborate the possibility and generality to manipulate the UCL through engineering the local structure in diverse Ln<sup>3+</sup>-doped UCNCs. Namely, the higher symmetry of crystal sublattice of host cation, the larger UCL R/G ratio of the substituted doping Er<sup>3+</sup> ion in Ln<sup>3+</sup>-doped inorganic upconversion NCs.

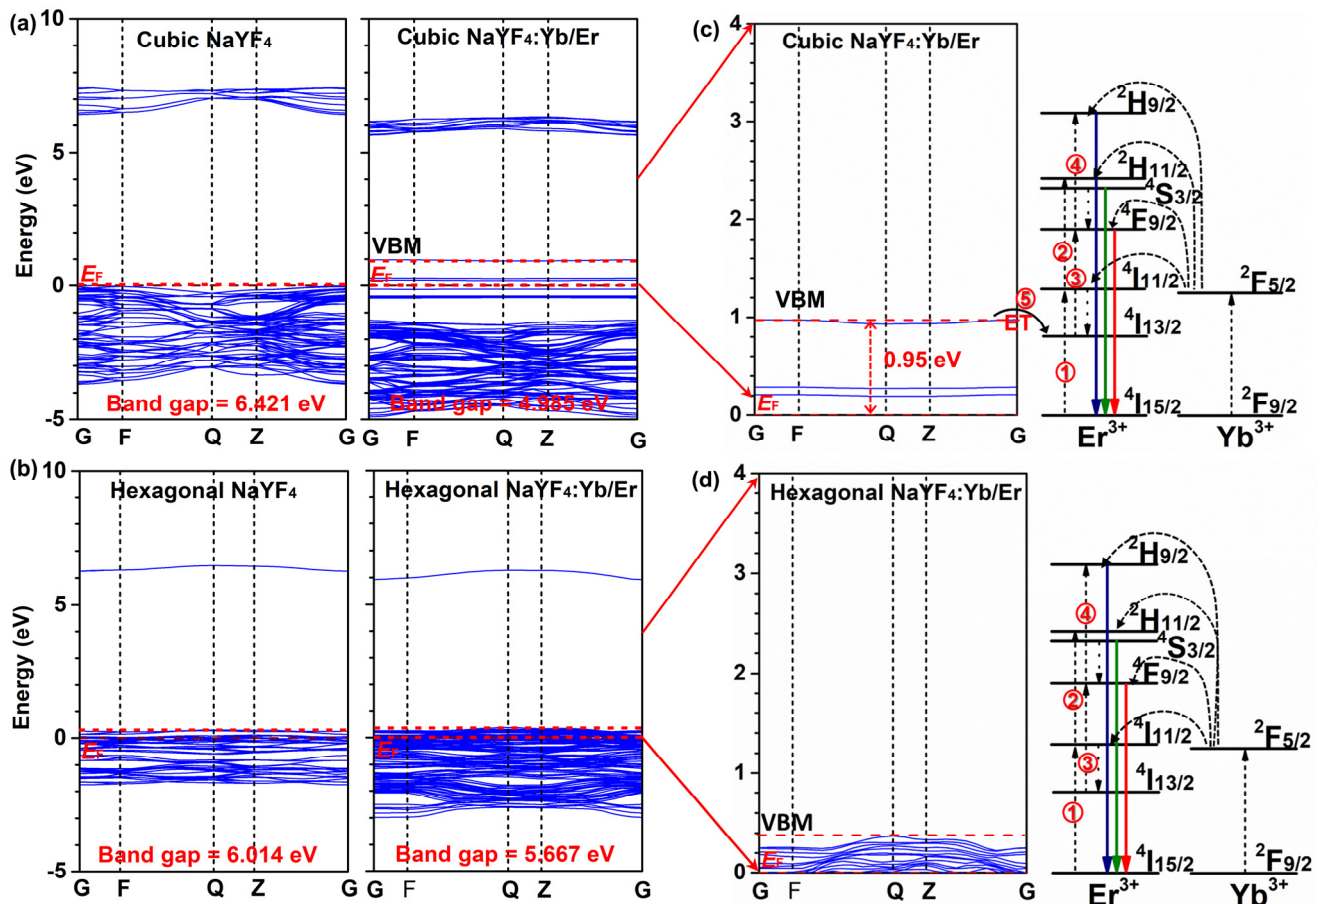

**Figure S15.** Comparison of DFT-calculated electronic band structures for pure and Yb/Er co-doped (a) cubic-phase and (b) hexagonal-phase NaYF<sub>4</sub> NCs, and the proposed energy transfer (ET) mechanisms between the excited Yb<sup>3+</sup>, Er<sup>3+</sup> and the valence bands in (c) cubic-phase NaYF<sub>4</sub>:Yb/Er and (d) hexagonal-phase NaYF<sub>4</sub>:Yb/Er NCs following excitation with a 980-nm laser. Note that the dashed, dotted, black and colored full arrows represent photon excitation, non-radiative multiphonon relaxation, ET and emission processes, respectively. As shown in Figure S15a-b, the VBM for the cubic-phase NaYF<sub>4</sub>:Yb/Er NCs was calculated to significantly increase from Fermi level ( $E_F$ , 0 eV) to 0.95 eV, while the VBM for the hexagonal-phase NaYF<sub>4</sub>:Yb/Er NCs kept almost unchanged before and after Yb<sup>3+</sup>/Er<sup>3+</sup> doping. These results clearly demonstrate that the symmetry of crystal lattices of these cubic-phase and hexagonal-phase NaYF<sub>4</sub>:Yb/Er NCs has significant impact on their respective electronic band structures after Yb<sup>3+</sup>/Er<sup>3+</sup> doping, similar to the cases of Yb<sup>3+</sup>/Er<sup>3+</sup> co-doped alkaline zirconium fluoride NCs aforementioned (Figure S10). Likewise, such significantly increased VBM (0.95 eV) for cubic-phase NaYF<sub>4</sub>:Yb/Er NCs can promote the ET between the valence band of the host and excited Er<sup>3+</sup> ion (Figure S15c), which will ultimately lead to the increased UCL R/G ratio in cubic-phase NaYF<sub>4</sub>:Yb/Er NCs when compared to their hexagonal-phase counterparts.
